# Supplementary material for: Sustainable carbon dots from Borreria hispida: enhanced colorimetric sensing of Fe3+ ions and biological applications in live cell imaging
Source: Royal Society of Chemistry journal article supplement (doi:10.1039/d4ra01686f), 2024-01-01
Supplement: d4ra01686f1.pdf [file d4ra01686f1.pdf]

## Sustainable Carbon Dots from *Borreria hispida*: Enhanced Colorimetric Sensing of Fe<sup>3+</sup> Ions and Biological Applications in Live Cell Imaging

Shanmuga Priya S and Suseem SR\*

Table S1: IC<sub>50</sub> of BHCD

| Concentration of Control Drug (µg/ml) | % of Cell Viability (Triplicate Values) |              |              |              |              |              |                 |
|---------------------------------------|-----------------------------------------|--------------|--------------|--------------|--------------|--------------|-----------------|
|                                       | Trial 1                                 | Trial 2      | Trial 2      | %Trial 1     | %Trial 2     | %Trial 3     | Average         |
| 100                                   | 32.6219<br>5                            | 31.9797      | 32.4489<br>8 | 67.3780<br>5 | 68.0203      | 67.5510<br>2 | 67.64979        |
| 50                                    | 38.6178<br>9                            | 38.7817<br>3 | 39.1836<br>7 | 61.3821<br>1 | 61.2182<br>7 | 60.8163<br>3 | 61.1389033<br>3 |
| 25                                    | 52.0325<br>2                            | 51.6751<br>3 | 52.2449      | 47.9674<br>8 | 48.3248<br>7 | 47.7551      | 48.0158166<br>7 |
| 12.5                                  | 67.2764<br>2                            | 67.8172<br>6 | 67.2449      | 32.7235<br>8 | 32.1827<br>4 | 32.7551      | 32.5538066<br>7 |
| 6.25                                  | 75.4065                                 | 75.6345<br>2 | 75.6122<br>4 | 24.5935      | 24.3654<br>8 | 24.3877<br>6 | 24.4489133<br>3 |
| Control                               | 100                                     | 100          | 100          | 100          | 100          | 100          | 100             |

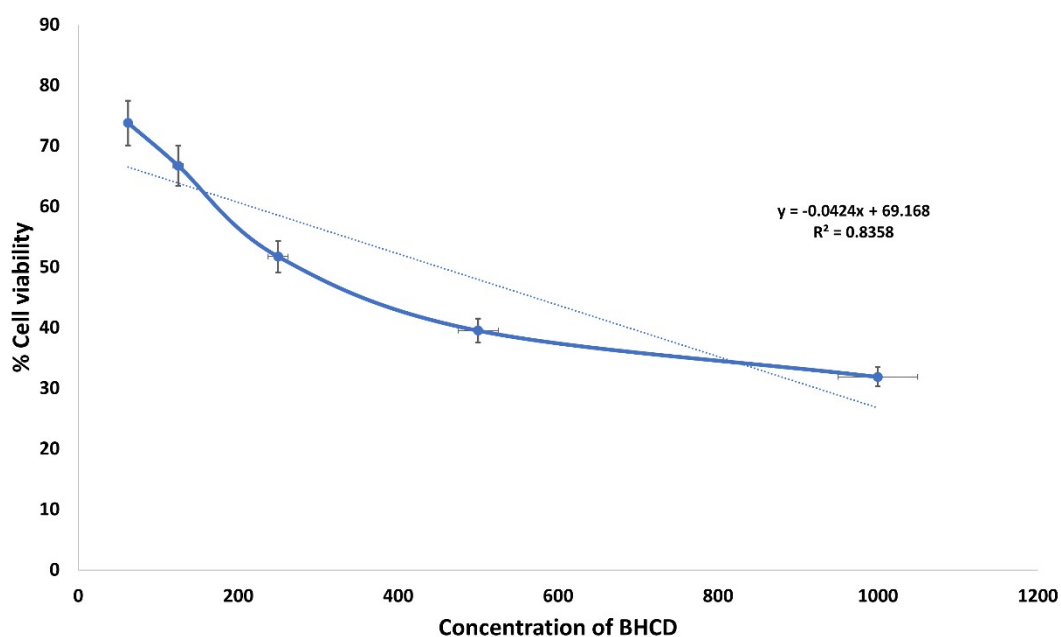

Fig. S1: Graph for Ic<sub>50</sub> of BHCD

Table S2: Cell viability of standard drug

| Concentration of Doxorubicin (µg/ml) | % of Cell Viability (Triplicate Values) |          |          |          |          |          |             |
|--------------------------------------|-----------------------------------------|----------|----------|----------|----------|----------|-------------|
|                                      | Trial 1                                 | Trial 2  | Trial 2  | % t 1    | % t 2    | % t 3    | Average     |
| 500                                  | 20.79832                                | 20.50473 | 20.25316 | 79.20168 | 79.49527 | 79.74684 | 79.48126333 |
| 250                                  | 44.64286                                | 44.26919 | 45.25316 | 55.35714 | 55.73081 | 54.74684 | 55.27826333 |
| 125                                  | 56.51261                                | 55.94111 | 55.90717 | 43.48739 | 44.05889 | 44.09283 | 43.87970333 |
| 62.5                                 | 68.06723                                | 67.50789 | 68.77637 | 31.93277 | 32.49211 | 31.22363 | 31.88283667 |
| 31.25                                | 75.73529                                | 74.02734 | 78.16456 | 24.26471 | 25.97266 | 21.83544 | 24.02427    |
| Control                              | 100                                     | 100      | 100      | 100      | 100      | 100      | 100         |

Table S3: Cell viability of standard drug

| Concentration of BHCD (µg/ml) | % of Cell Viability (Triplicate Values) |          |          |          |          |          |             |
|-------------------------------|-----------------------------------------|----------|----------|----------|----------|----------|-------------|
|                               | Trial 1                                 | Trial 2  | Trial 2  | % t 1    | % t 2    | % t 3    | Average     |
| 1000                          | 31.87817                                | 32.14286 | 31.67006 | 68.12183 | 67.85714 | 68.32994 | 68.10297    |
| 500                           | 39.08629                                | 39.89796 | 39.61303 | 60.91371 | 60.10204 | 60.38697 | 60.46757333 |
| 250                           | 50.86294                                | 52.34694 | 52.03666 | 49.13706 | 47.65306 | 47.96334 | 48.25115333 |
| 125                           | 66.80203                                | 66.53061 | 66.90428 | 33.19797 | 33.46939 | 33.09572 | 33.25436    |
| 62.25                         | 73.60406                                | 74.28571 | 73.52342 | 26.39594 | 25.71429 | 26.47658 | 26.19560333 |
| Control                       | 100                                     | 100      | 100      | 100      | 100      | 100      | 100         |

**Table. S4 . Comparison of this study with previously published articles**

| Name of the plant                    | Method of synthesis | size of carbon dot | Metal sensed                        | Limit of Detection    | Reference    |
|--------------------------------------|---------------------|--------------------|-------------------------------------|-----------------------|--------------|
| <i>Borreria Hispida</i>              | Hydrothermal        | 3.33nm             | Fe <sup>3+</sup>                    | 1.2 x10 <sup>-6</sup> | present work |
| <i>canon ball fruit</i>              | Hydrothermal        | 11.2 nm            | Fe <sup>3+</sup>                    | 0.071 µM              | 1            |
| <i>Tinospora cordifolia</i>          | Hydrothermal        | 5.47 nm            | Fe <sup>3+</sup>                    | 0.414 µM              | 2            |
| <i>Sophora japonica</i>              | Hydrothermal        | 3.0 nm             | Fe <sup>3+</sup>                    | 8.75 ppb (3σ/S)       | 3            |
| <i>flowers of wintersweet</i>        | Hydrothermal        | 1.5 nm             | Cr (VI)& Fe <sup>3+</sup>           | 0.07 µMand 0.15 µM,   | 4            |
| <i>Syringa obtata Lindl</i>          | Hydrothermal        | 2.76 nm            | Fe <sup>3+</sup>                    | 0.11 µM               | 5            |
| <i>rose-heart radish</i>             | Hydrothermal        | 3.6 nm             | Fe <sup>3+</sup>                    | 0.13µM (S/N = 3)      | 6            |
| <i>coriander leaves</i>              | Hydrothermal        | 2.387 nm           | Fe <sup>3+</sup>                    | 0.4 µM                | 7            |
| <i>Polianthes tuberosa L. Petals</i> | Carbanization       | 4 to 6 nm          | Fe <sup>2+</sup> & Cu <sup>2+</sup> | 200 nM                | 8            |

|                      |              |           |                  |                  |    |
|----------------------|--------------|-----------|------------------|------------------|----|
| <i>Lycii Fructus</i> | Refluxation  | 4 to 7 nm | Fe <sup>3+</sup> | 21 nM            | 9  |
| <i>cornstalk</i>     | Hydrothermal | 5.2 nm    | Fe <sup>2+</sup> | 0.18 and 0.21 μM | 43 |
| <i>onion waste</i>   | Hydrothermal | 15nm      | Fe <sup>2+</sup> | 0.31nm           | 44 |

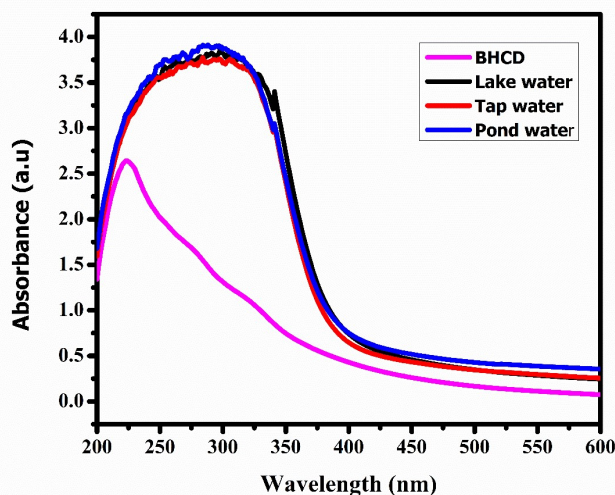

Fig. S2. UV-Vis spectrum of different water source with Fe<sup>3+</sup>.

#### References:

1. Varman, G. A., Kalanidhi, K., & Nagaraaj, P. (2022). Green synthesis of fluorescent carbon dots from canon ballfruit for sensitive detection of Fe<sup>3+</sup> and catalytic reduction of textile dyes. *Dyes and Pigments*, 199, 110101.
2. Mohapatra, D., Pratap, R., Pandey, V., Dubey, P. K., Agrawal, A. K., Parmar, A. S., & Sahu, A. N. (2021). *Tinospora cordifolia* Leaves Derived Carbon dots for Cancer Cell Bioimaging, Free radical Scavenging, and Fe<sup>3+</sup> Sensing Applications. *Journal of Fluorescence*, 1-18.
3. Hou, J., Wang, X., Lan, S., Zhang, C., Hou, C., He, Q., & Huo, D. (2020). A turn-on fluorescent sensor based on carbon dots from *Sophora japonica* leaves for the detection of glyphosate. *Analytical Methods*, 12(33), 4130-4138.
4. Xia, L., Li, X., Zhang, Y., Zhou, K., Yuan, L., Shi, R., ... & Fu, Q. (2022). Sustainable and green synthesis of waste-biomass-derived carbon dots for parallel and semi-quantitative visual detection of Cr (VI) and Fe<sup>3+</sup>. *Molecules*, 27(4), 1258.
5. Diao, H., Li, T., Zhang, R., Kang, Y., Liu, W., Cui, Y., ... & Sun, T. (2018). Facile and green synthesis of fluorescent carbon dots with tunable emission for sensors and cells imaging. *Spectrochimica Acta Part A: Molecular and Biomolecular Spectroscopy*, 200, 226-234.
6. Liu, W., Diao, H., Chang, H., Wang, H., Li, T., & Wei, W. (2017). Green synthesis of carbon dots from rose-hearthradish and application for Fe<sup>3+</sup> detection and cell imaging. *Sensors and Actuators B: Chemical*, 241, 190-198.
7. Sachdev, A., & Gopinath, P. (2015). Green synthesis of multifunctional carbon dots from coriander leaves and their potential application as antioxidants, sensors and bioimaging agents. *Analyst*, 140(12), 4260-4269.
8. Rooj, B., Dutta, A., Islam, S., & Mandal, U. (2018). Green synthesized carbon quantum dots from

polianthes tuberosa L. Petals for Copper (II) and Iron (II) detection. *Journal of fluorescence*, 28, 1261-1267.

9. Sun, X., He, J., Yang, S., Zheng, M., Wang, Y., Ma, S., & Zheng, H. (2017). Green synthesis of carbon dots originated from Lycii Fructus for effective fluorescent sensing of ferric ion and multicolor cell imaging. *Journal of Photochemistry and Photobiology B: Biology*, 175, 219-225.
